# Supplementary material for: Factor H binding protein (FHbp): An evaluation of genotypic diversity across Neisseria meningitidis serogroups
Source: PubMed Central journal article supplement — Hum Vaccin Immunother. 2024 Oct 10;20(1):2409502. doi: 10.1080/21645515.2024.2409502 (PMC11469366; doi:10.1080/21645515.2024.2409502), 2024-10-10
Supplement: KHVI_A_2409502_SM7092.pdf [file KHVI_A_2409502_SM7092.pdf]

1 **Supplementary Appendix**

**Li\_Supplementary Table 1. Nomenclature for the Pfizer and Novartis variants**

| <b>Pfizer variant</b> | <b>PubMLST FHbp<br/>peptide allele ID</b> | <b>Novartis variant family</b> | <b>Novartis variant</b> |
|-----------------------|-------------------------------------------|--------------------------------|-------------------------|
| A05                   | 45                                        | 3                              | 3.45                    |
| A06                   | 47                                        | 3                              | 3.47                    |
| A07                   | 21                                        | 2                              | 2.21 (PKA 2.6)          |
| A12                   | 24                                        | 2                              | 2.24 (PKA 2.9)          |
| A15                   | 25                                        | 2                              | 2.25 (PKA 2.10)         |
| A19                   | 16                                        | 2                              | 2.16 (PKA 2.1)          |
| A22                   | 19                                        | 2                              | 2.19 (PKA 2.4)          |
| A106                  | 27                                        | 2                              | 2.27 (PKA 2.12)         |
| B03                   | 14                                        | 1                              | 1.14                    |
| B09                   | 13                                        | 1                              | 1.13                    |
| B15                   | 252                                       | 1                              | 1.252                   |
| B16                   | 4                                         | 1                              | 1.4                     |
| B22                   | 5                                         | 1                              | 1.5                     |
| B24                   | 1                                         | 1                              | 1.1                     |
| B44                   | 15                                        | 1                              | 1.15                    |
| B45                   | 9                                         | 1                              | 1.9                     |
| B49                   | 74                                        | 1                              | 1.74                    |
| B130                  | 321                                       | 1                              | 1.321                   |

FHbp=factor H binding protein; PKA=previously known as.
